# Supplementary material for: 2D reentrant auxetic structures of graphene/CNT networks for omnidirectionally stretchable supercapacitors
Source: Royal Society of Chemistry journal article supplement (doi:10.1039/c7nr02869e), 2017-01-01
Supplement: c7nr02869e1.pdf [file c7nr02869e1.pdf]

## Supplementary Information

### 2D Reentrant Auxetic Structures of Graphene/CNT Networks for Omnidirectionally Stretchable Supercapacitors

Byoung Soo Kim,<sup>ab</sup> Kangsuk Lee,<sup>ac</sup> Seulki Kang,<sup>ab</sup> Soyeon Lee,<sup>d</sup> Jun Beom Pyo,<sup>a</sup> In Suk Choi,<sup>d</sup> Kookheon Char,<sup>c</sup> Jong Hyuk Park,<sup>a</sup> Sang-Soo Lee,<sup>a</sup> Jonghwi Lee,<sup>b\*</sup> and Jeong Gon Son<sup>a\*</sup>

<sup>a</sup> Photo-Electronic Hybrids Research Center, Korea Institute of Science and Technology, Seoul 02792, Republic of Korea

<sup>b</sup> Department of Chemical Engineering and Materials Science, Chung-Ang University, Seoul 06974, Republic of Korea

<sup>c</sup> Department of Chemical and Biological Engineering, Seoul National University, Seoul 08826, Republic of Korea

<sup>d</sup> High Temperature Energy Materials Research Center, Institute of Science and Technology, Seoul 02792, Republic of Korea

<sup>†</sup> Electronic Supplementary Information (ESI) available: A supporting document with additional technical details is included as a separate PDF file. See DOI: 10.1039/x0xx00000x

\* Corresponding author.

E-mail: jgson@kist.re.kr (J. G. Son) and jong@cau.ac.kr (J. Lee)

## Supplemental Figures

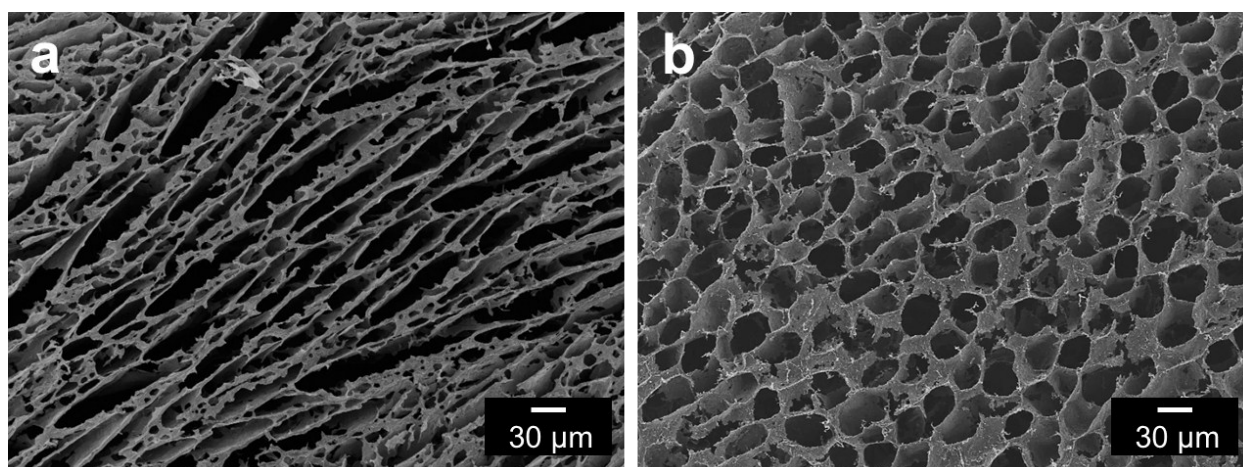

**Figure S1.** SEM micrographs of the top surface of rGCN-DC with different solvents: (a) water and (b) 1,4-dioxane case.

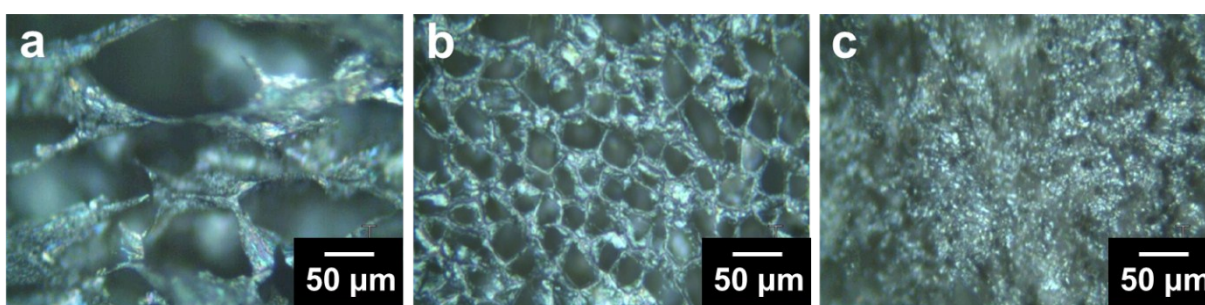

**Figure S2.** Optical micrographs of the top surface of rGCN-DCs at different cooling rates: (a) 4.0 °C·min<sup>-1</sup>, (b) 5.5 °C·min<sup>-1</sup>, and (c) 7.5 °C·min<sup>-1</sup>, respectively.

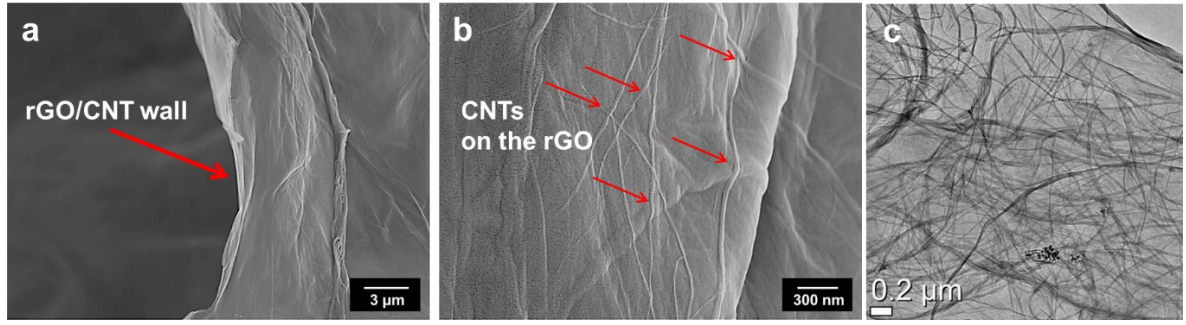

**Figure S3.** (a) SEM micrographs of pore wall surface of rGCN-DC and (b) magnified image of pore wall surface and (c) TEM images of rGCN-DC.

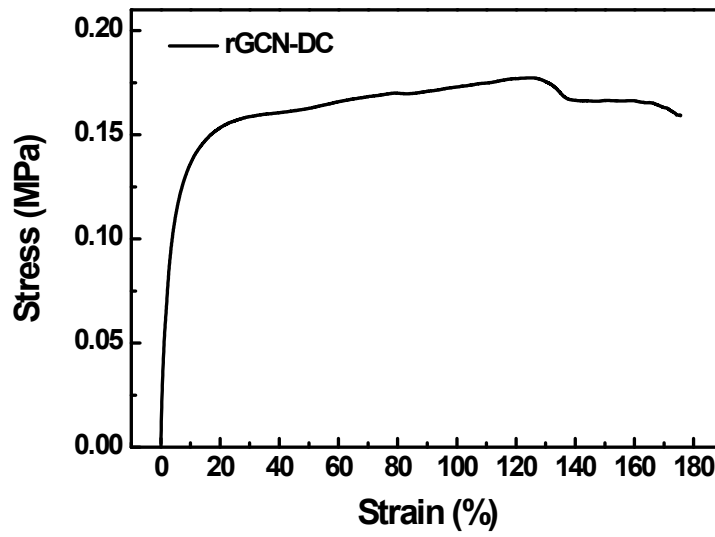

**Figure S4.** A representative stress-strain curve of the 2D auxetic cellular rGCN-DC network. Specimens of 15 x 10 mm with a thickness 10 mm were pulled at a crosshead speed of 0.1 mm/s.

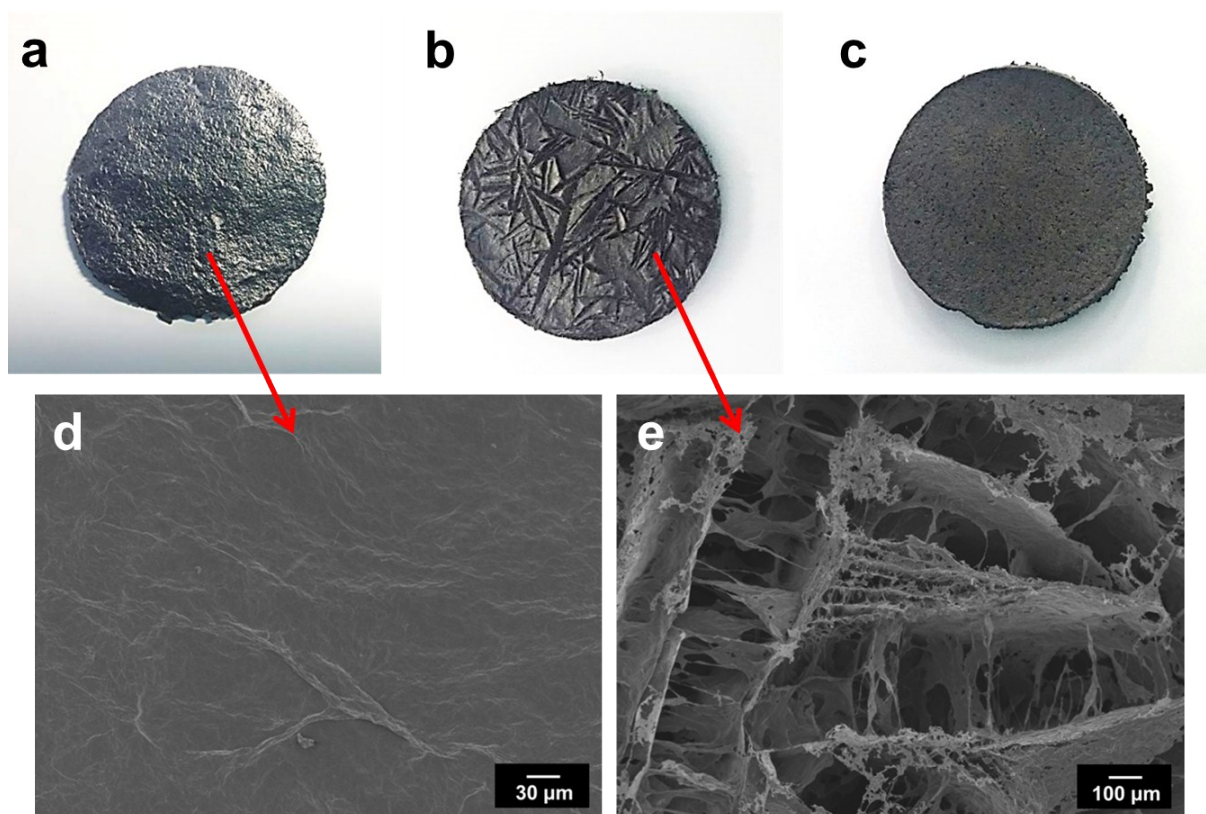

**Figure S5.** Digital images of three electrodes: (a) rGCN-Film, (b) rGCN-RC, and (c) rGCN-DC. SEM micrographs of the top surface of (d) rGCN-Film and (e) rGCN-RC electrode, respectively.

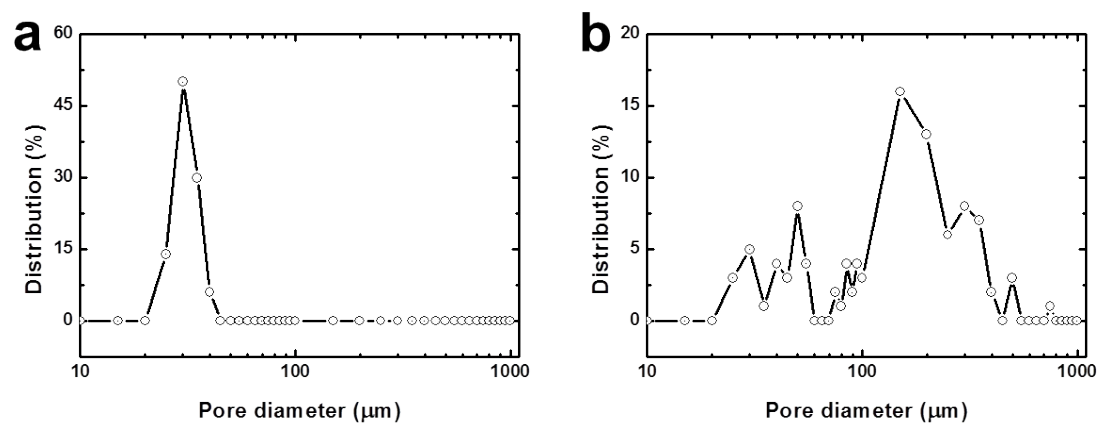

**Figure S6.** P Pore size distribution of (a) rGCN-DCs and (b) rGCN-RCs.

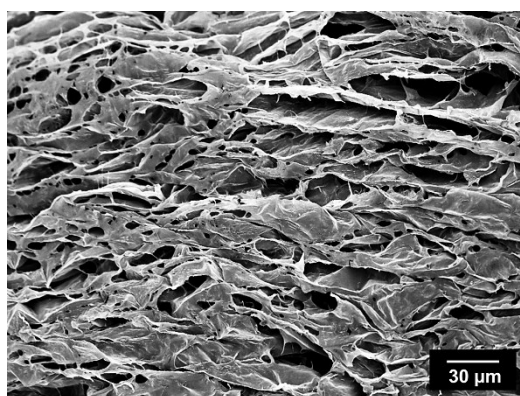

**Figure S7.** SEM micrographs of the top surface of rGCN-RC after rolling & compressing proces.

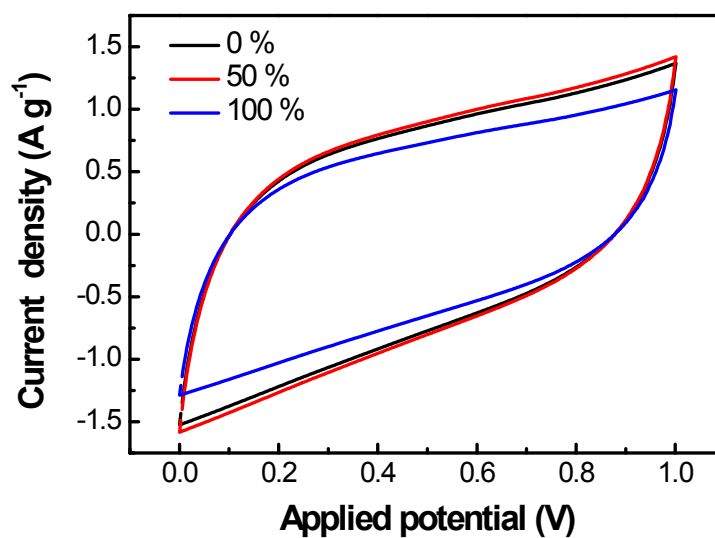

**Figure S8.** Representative cyclic voltammetry curves (CVs) with different strains at a scan rate of  $100 \text{ mV}\cdot\text{s}^{-1}$ .

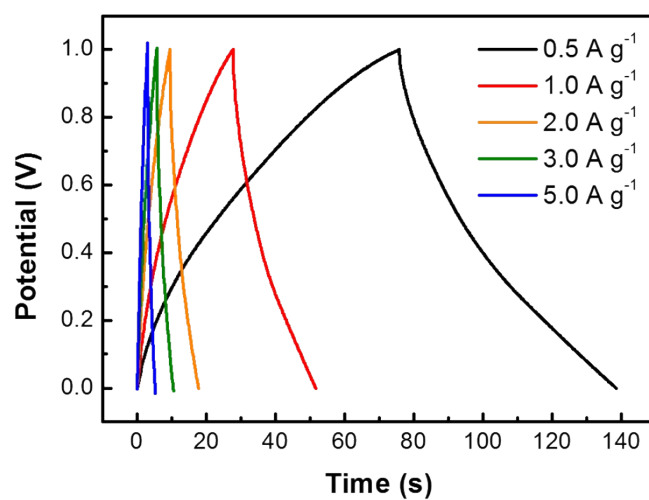

**Figure S9.** The galvanostatic charge/discharge curve of ASSC-DC at various charging/discharging currents from  $0.5$  to  $5 \text{ A}\cdot\text{g}^{-1}$ .



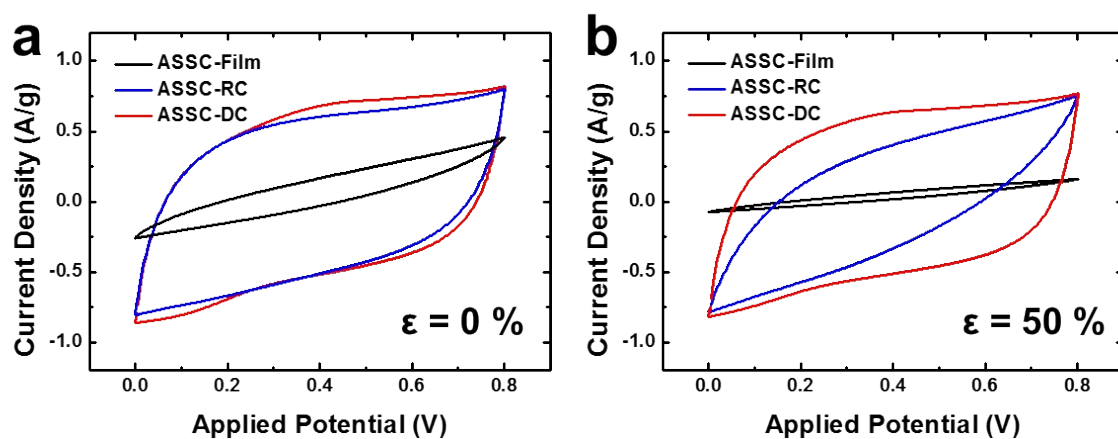

**Figure S10.** Representative CV curves of the three ASSCs based on rGCN-Film, rGCN-RC and rGCN-DC electrodes (a) without strain and (b) with a strain of 50% at a scan rate of  $30 \text{ mV}\cdot\text{s}^{-1}$ .

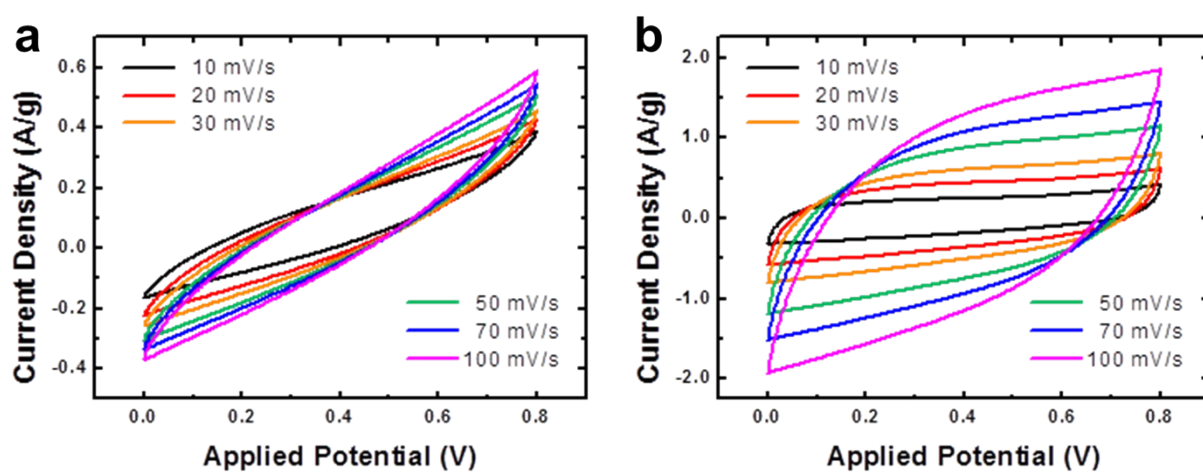

**Figure S11.** Representative CVs of (a) ASSC-Film and (b) ASSC-RC at various scan rates from 10 to  $100 \text{ mV}\cdot\text{s}^{-1}$ .

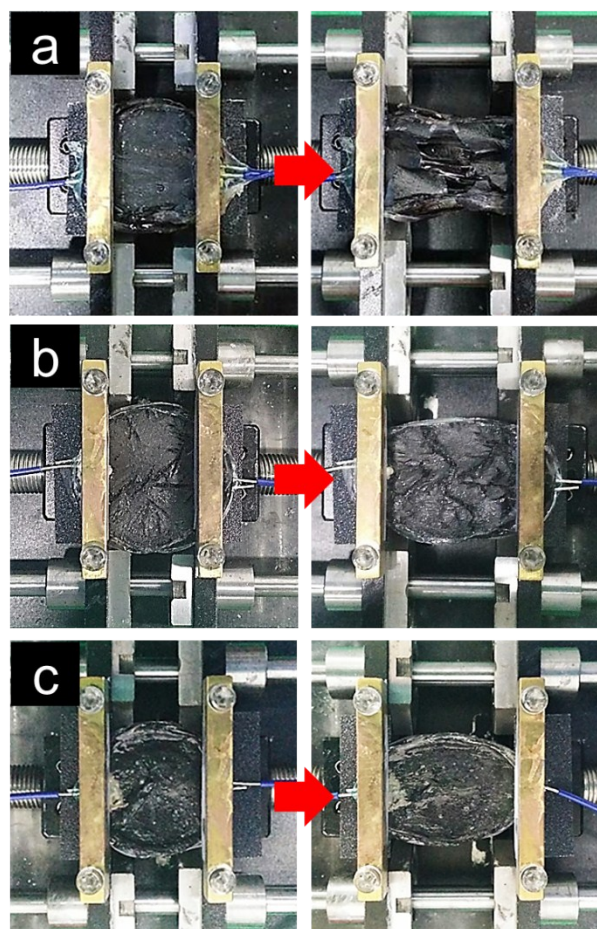

**Figure S12.** Digital images of three ASSCs based on (a) rGCN-Film, (c) rGCN-RC, and (e) rGCN-DC electrodes are stretched to 50%.
